# Supplementary material for: A cluster of melioidosis infections in hatchling saltwater crocodiles (Crocodylus porosus) resolved using genome-wide comparison of a common north Australian strain of Burkholderia pseudomallei
Source: PubMed Central journal article supplement — Microb Genom. 2019 Aug 21;5(8):e000288. doi: 10.1099/mgen.0.000288 (PMC6755496; doi:10.1099/mgen.0.000288), 2019-08-21
Supplement: mgen-5-288-s001.pdf [file mgen-5-288-s001.pdf]

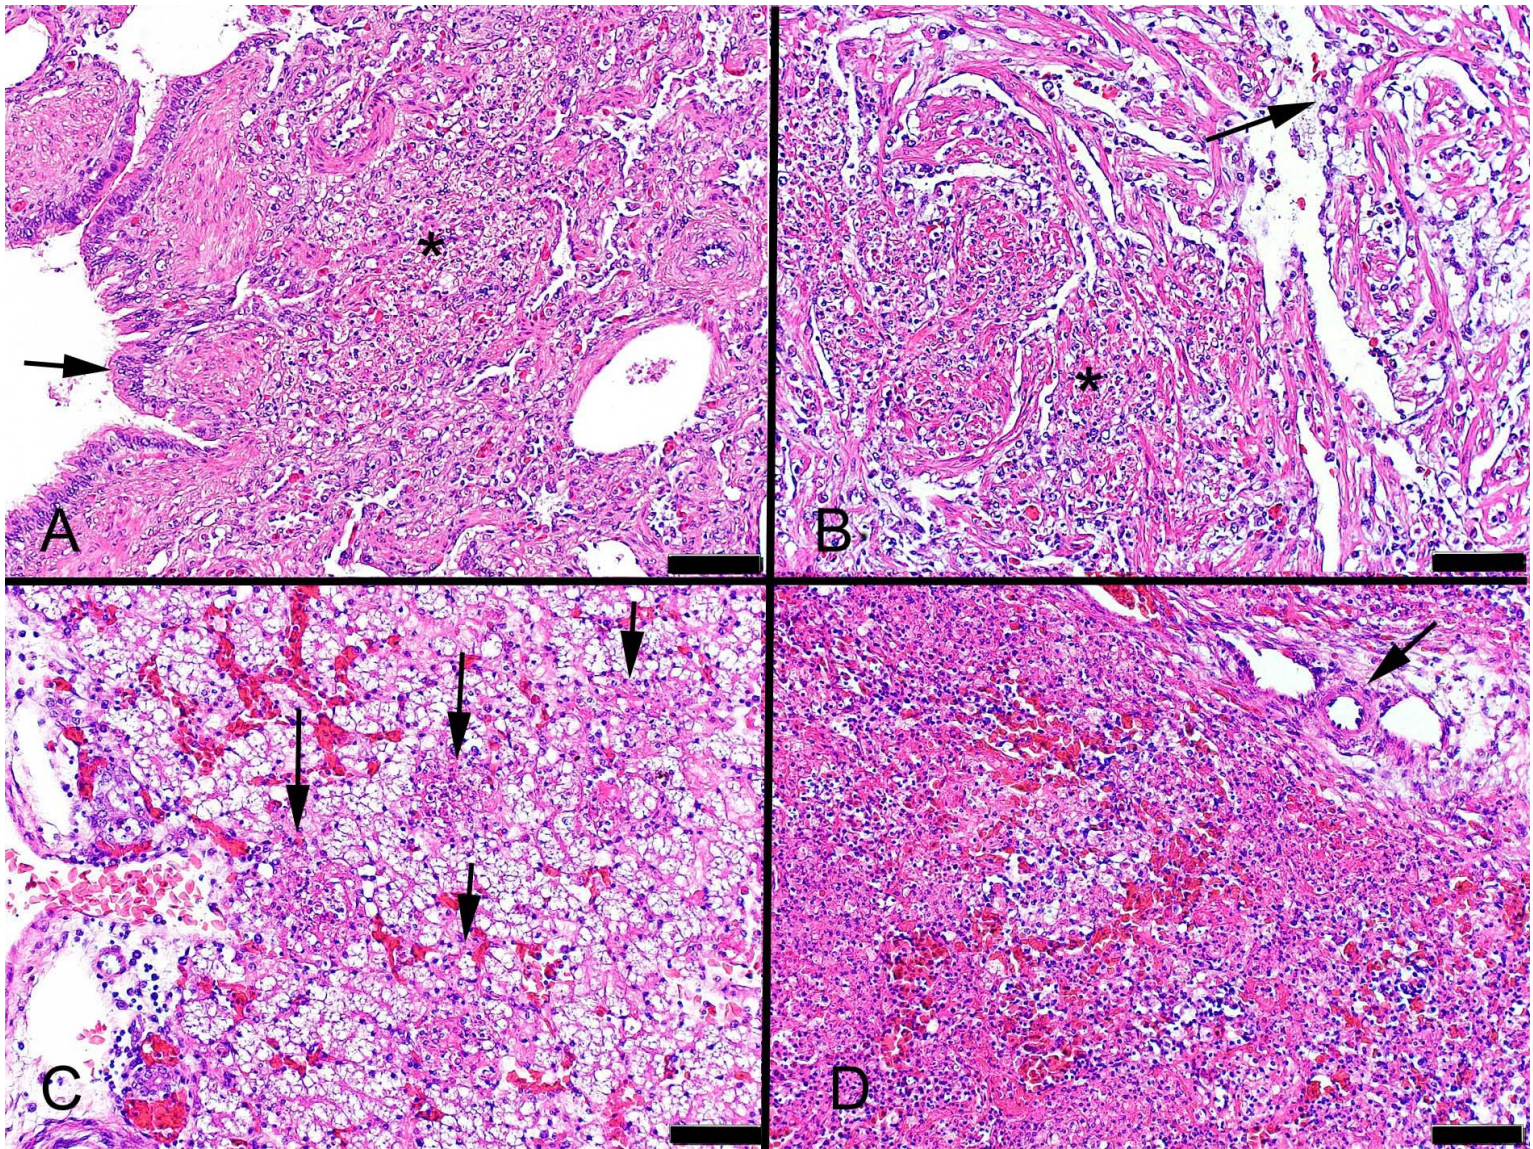

**Figure S1.-** Histology photomicrographs. (A). Lung from first crocodile with a large focus of necrosis and heterophil infiltration (asterisk) and acute diffuse interstitial pneumonia characterised by interstitial expansion due to oedema, fibrin, heterophil and macrophage infiltration. Note normal, unaffected epithelium lining large airway (arrow). HE. Bar = 100  $\mu$ m. (B). Heart from first crocodile with a large focus of lytic necrosis with associated heterophil infiltration (asterisk) and diffuse hypertrophy of endocardium with mild infiltration of mixed inflammatory cells (arrow). HE. Bar = 100  $\mu$ m. C. Liver from second crocodile showing random multifocal necrosis (arrows). The liver is congested, and there are dilated lymphatics (clear spaces) beside a large portal area at the left of the image. The vacuolated appearance of viable hepatocytes is normal for hatchling crocodile liver. HE. Bar = 100  $\mu$ m. D. Spleen from second crocodile showing coalescing necrosis involving most of the parenchyma, obliterating all splenic arterioles, with only a few remaining lymphocytes and architectural remnants, such as the small artery at the arrow. HE. Bar = 100  $\mu$ m.

## Gene presence-absence matrix

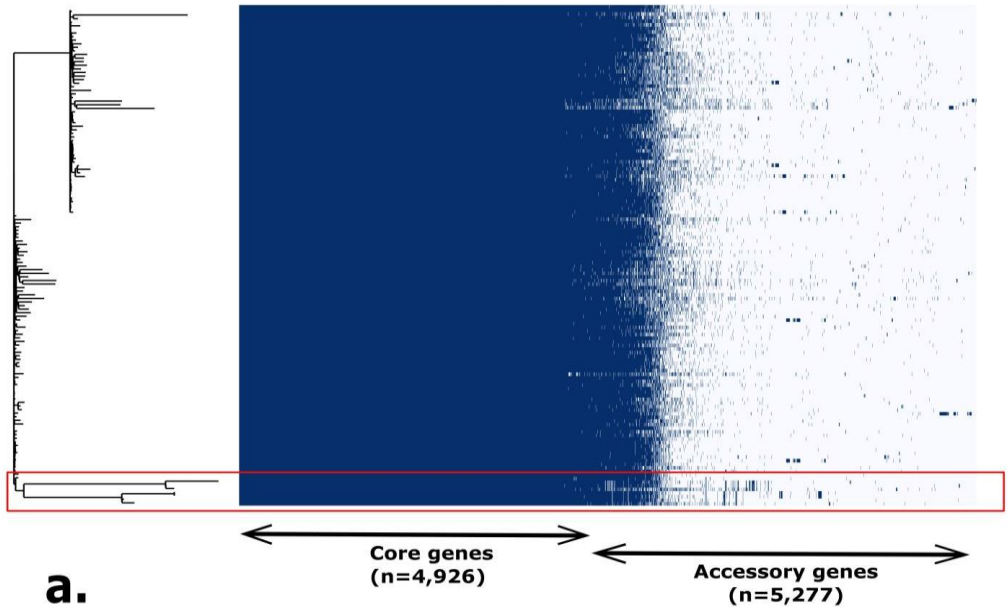

**a.**

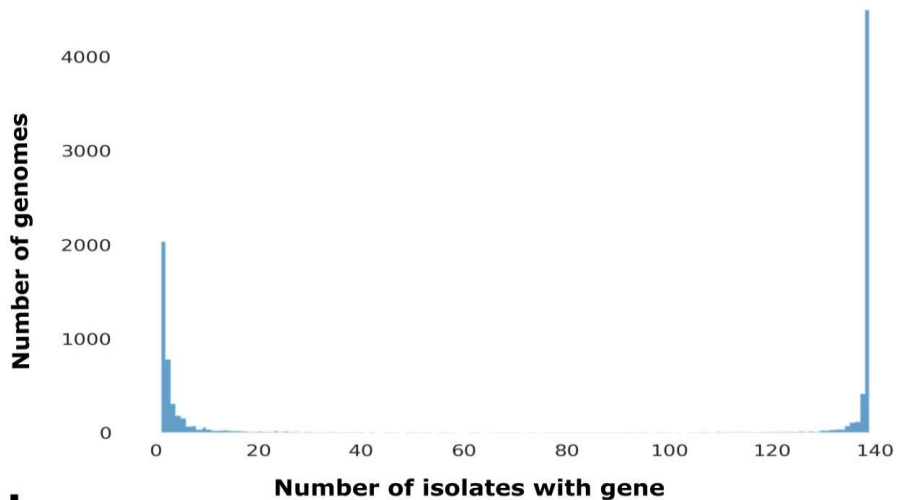

**b.**

**Figure S2.-** The *B. pseudomallei* ST-109 pan-genome. (a.) A heatmap showing gene presence (dark blue) or absence (light blue) in each of the 139 strains. A phylogeny built based on the 4,926 core genes is shown on the left. Red box highlights cluster containing nine of the ten outlier ST-109 genomes (MSHR0457, MSHR0537, MSHR2157, MSHR3915, MSHR4462, MSHR4483, MSHR6049, MSHR6437, MSHR9037). (b.) A histogram displaying the distribution of how many genomes each gene is found within.

| Sample ID | Sample Type | Collection Date | Sample Location                                          |
|-----------|-------------|-----------------|----------------------------------------------------------|
| CP37*     | Soil        | 12/5/16         | Grass area adjacent to crocodile hatchling holding tanks |
| CPW2      | Water       | 12/5/16         | Water collected from feed channel in holding tanks       |
| CPW3      | Water       | 12/5/16         | Water collected from feed channel in holding tanks       |
| CPW4      | Water       | 12/5/16         | Water collected from feed channel in holding tanks       |
| CPW5*     | Water       | 12/5/16         | Water collected from deceased hatchlings holding tank    |
| CPW6      | Water       | 12/5/16         | Drain area adjacent to tank                              |
| CPW7      | Water       | 12/5/16         | Drain area hose                                          |
| CPSW1     | Env swab    | 12/5/16         | Swab from croc resting area in holding tank              |
| CPSW2     | Env swab    | 12/5/16         | Swab from feeding channel in holding tank                |
| CPSW3     | Env swab    | 12/5/16         | Swab from feed area where food is placed in holding tank |
| CPSW4     | Env swab    | 12/5/16         | Swab from floating boards in holding tank                |
| CPSW5     | Env swab    | 12/5/16         | Swab from floating boards in holding tank                |
| CPSW6     | Env swab    | 12/5/16         | Swab from drain in holding tank                          |
| CPSW7     | Env swab    | 12/5/16         | Bottom of drain float swab in holding tank               |
| CPW8      | Water       | 16/5/16         | Feeding channel water adjacent to deceased croc tank     |
| CPW9      | Water       | 16/5/16         | Water from hatchling holding tank                        |
| CPSW19    | Env swab    | 16/5/16         | Bio film swab from feeding channel                       |
| CPW10     | Water       | 16/5/16         | Tank feeding channel water                               |
| CPSW20*   | Env swab    | 16/5/16         | Swab from wall of incubator                              |
| CPSW21    | Env swab    | 16/5/16         | Swab from incubator egg racks                            |
| CPW11     | Water       | 16/5/16         | Water from inside hatchling incubator                    |
| CPA3A     | Air         | 16/5/16         | Air sample from hatchling incubator                      |
| CPSW22    | Env Swab    | 30/5/16         | Swab from wall of incubator                              |
| CPSW23    | Env swab    | 30/5/16         | Swab from wall of incubator                              |
| CPSW24    | Env swab    | 30/5/16         | Swab from room incubator racks                           |
| CPW12     | Water       | 30/5/16         | Water from hatchling holding tank                        |
| CPW13     | Water       | 30/5/16         | Water from hatchling holding tank                        |
| CPW14     | Water       | 30/5/16         | Water from hatchling holding tank                        |
| CPW15     | Water       | 30/5/16         | Water from hatchling holding tank                        |
| CPW16     | Water       | 30/5/16         | Water from hatchling holding tank                        |
| CPW17     | Water       | 30/5/16         | Water from hatchling holding tank                        |
| CPW18*    | Water       | 30/5/16         | Water collected from deceased hatchlings holding tank    |
| CPW19     | Water       | 30/5/16         | Water from hatchling holding tank                        |

| Sample ID | Original species designation     | Source of sample | Year | Region of sample origin (NT, Aus) | NSB score | Contigs | Total length | GenBank/SRA accession no. | Reference                                                  |
|-----------|----------------------------------|------------------|------|-----------------------------------|-----------|---------|--------------|---------------------------|------------------------------------------------------------|
| MSHR0064  | <i>Burkholderia pseudomallei</i> | Human            | 1991 | Urban Darwin                      | 124493    | 92      | 7142432      | SAMN1617318               | This study                                                 |
| MSHR0067  | <i>Burkholderia pseudomallei</i> | Human            | 1991 | Urban Darwin                      | 124493    | 159     | 7132294      | SRP065595                 | Price EP et al. Appl Environ Microbiol. 2016;82(3):954-63. |
| MSHR0068  | <i>Burkholderia pseudomallei</i> | Human            | 1991 | Urban Darwin                      | 125281    | 71      | 7140942      | SAMN1617319               | This study                                                 |
| MSHR0071  | <i>Burkholderia pseudomallei</i> | Human            | 1991 | Urban Darwin                      | 142837    | 92      | 7137704      | SAMN1617320               | This study                                                 |
| MSHR0082  | <i>Burkholderia pseudomallei</i> | Human            | 1991 | Urban Darwin                      | 125204    | 77      | 7167678      | SAMN1617321               | This study                                                 |
| MSHR0090  | <i>Burkholderia pseudomallei</i> | Human            | 1991 | Urban Darwin                      | 147084    | 77      | 7140636      | SAMN1617322               | This study                                                 |
| MSHR0128  | <i>Burkholderia pseudomallei</i> | Human            | 1991 | Urban Darwin                      | 209454    | 616     | 7087625      | SRP065595                 | Price EP et al. Appl Environ Microbiol. 2016;82(3):954-63. |
| MSHR0138  | <i>Burkholderia pseudomallei</i> | Human            | 1993 | Darwin rural region               | 226160    | 49      | 7135940      | SRP065595                 | Price EP et al. Appl Environ Microbiol. 2016;82(3):954-63. |
| MSHR0245  | <i>Burkholderia pseudomallei</i> | Human            | 1994 | Urban Darwin                      | 25281     | 430     | 7067328      | SAMN1617323               | This study                                                 |
| MSHR0342  | <i>Burkholderia pseudomallei</i> | Human            | 1994 | Darwin remote region              | 51816     | 220     | 7116833      | SAMN1617324               | This study                                                 |
| MSHR0358  | <i>Burkholderia pseudomallei</i> | Human            | 1995 | Darwin remote region              | 142814    | 88      | 7123200      | SAMN1617325               | This study                                                 |
| MSHR0457  | <i>Burkholderia pseudomallei</i> | Human            | 1996 | Urban Darwin                      | 209454    | 53      | 7225253      | SRP065595                 | Price EP et al. Appl Environ Microbiol. 2016;82(3):954-63. |
| MSHR0517  | <i>Burkholderia pseudomallei</i> | Human            | 1998 | Urban Darwin                      | 105247    | 108     | 7138749      | SAMN1617326               | This study                                                 |
| MSHR0537  | <i>Burkholderia pseudomallei</i> | Human            | 1998 | Adelaide River region             | 173827    | 73      | 7168923      | SAMN1617327               | This study                                                 |
| MSHR0538  | <i>Burkholderia pseudomallei</i> | Human            | 1998 | Urban Darwin                      | 113648    | 92      | 7132028      | SAMN1617328               | This study                                                 |
| MSHR0539  | <i>Burkholderia pseudomallei</i> | Human            | 1998 | Urban Darwin                      | 64427     | 201     | 7128449      | SAMN1617329               | This study                                                 |
| MSHR0579  | <i>Burkholderia pseudomallei</i> | Human            | 1998 | Urban Darwin                      | 140569    | 91      | 7147514      | SAMN1617330               | This study                                                 |
| MSHR0585  | <i>Burkholderia pseudomallei</i> | Human            | 1998 | Urban Darwin                      | 138354    | 83      | 7149896      | SAMN1617331               | This study                                                 |
| MSHR0605  | <i>Burkholderia pseudomallei</i> | Human            | 1999 | Urban Darwin                      | 348030    | 35      | 7136846      | SAMN1617332               | This study                                                 |
| MSHR0640  | <i>Burkholderia pseudomallei</i> | Human            | 1998 | Darwin remote region              | 206160    | 58      | 7131172      | JQF0000000                | Johnson et al. Genome Announc. 2015 3(1):e01282-14         |
| MSHR0643  | <i>Burkholderia pseudomallei</i> | Human            | 1998 | Urban Darwin                      | 156461    | 80      | 7135967      | SAMN1617333               | This study                                                 |
| MSHR0719  | <i>Burkholderia pseudomallei</i> | Human            | 1998 | Urban Darwin                      | 102184    | 121     | 7143941      | SAMN1617334               | This study                                                 |
| MSHR0738  | <i>Burkholderia pseudomallei</i> | Human            | 1998 | Adelaide River region             | 141915    | 101     | 7121528      | SAMN1617335               | This study                                                 |
| MSHR0741  | <i>Burkholderia pseudomallei</i> | Human            | 1999 | Urban Darwin                      | 34355     | 339     | 7089758      | SAMN1617336               | This study                                                 |
| MSHR0749  | <i>Burkholderia pseudomallei</i> | Human            | 1999 | Darwin remote region              | 26342     | 442     | 7060285      | SAMN1617337               | This study                                                 |
| MSHR0811  | <i>Burkholderia pseudomallei</i> | Human            | 1999 | Darwin rural region               | 24624     | 226     | 7090959      | SAMN1617338               | This study                                                 |
| MSHR0883  | <i>Burkholderia pseudomallei</i> | Human            | 1999 | Urban Darwin                      | 66925     | 178     | 7119512      | SAMN1617339               | This study                                                 |
| MSHR0910  | <i>Burkholderia pseudomallei</i> | Human            | 2000 | Darwin rural region               | 78815     | 162     | 7123709      | SRP065595                 | Price EP et al. Appl Environ Microbiol. 2016;82(3):954-63. |
| MSHR0980  | <i>Burkholderia pseudomallei</i> | Human            | 2000 | Urban Darwin                      | 33164     | 359     | 7087926      | SAMN1617340               | This study                                                 |
| MSHR1189  | <i>Burkholderia pseudomallei</i> | Human            | 2001 | Darwin remote region              | 30814     | 373     | 7075731      | SAMN1617341               | This study                                                 |
| MSHR1273  | <i>Burkholderia pseudomallei</i> | Human            | 2001 | Urban Darwin                      | 43720     | 697     | 7147063      | SAMN1617342               | This study                                                 |
| MSHR1294  | <i>Burkholderia pseudomallei</i> | Human            | 2001 | Urban Darwin                      | 56233     | 202     | 7112476      | SAMN1617343               | This study                                                 |
| MSHR1349  | <i>Burkholderia pseudomallei</i> | Human            | 2002 | Urban Darwin                      | 39911     | 451     | 7099255      | SAMN1617344               | This study                                                 |
| MSHR1361  | <i>Burkholderia pseudomallei</i> | Human            | 2002 | Darwin remote region              | 25286     | 367     | 7068577      | SAMN1617345               | This study                                                 |
| MSHR1401  | <i>Burkholderia pseudomallei</i> | Human            | 2002 | Urban Darwin                      | 141464    | 60      | 7130977      | SAMN1617346               | This study                                                 |
| MSHR1429  | <i>Burkholderia pseudomallei</i> | Human            | 2002 | Darwin rural region               | 52470     | 187     | 7120442      | SAMN1617347               | This study                                                 |
| MSHR1531  | <i>Burkholderia pseudomallei</i> | Human            | 2003 | Urban Darwin                      | 102375    | 118     | 7133848      | SAMN1617348               | This study                                                 |
| MSHR1609  | <i>Burkholderia pseudomallei</i> | Human            | 2003 | Urban Darwin                      | 148640    | 82      | 7150082      | SAMN1617349               | This study                                                 |
| MSHR1714  | <i>Burkholderia pseudomallei</i> | Human            | 2003 | Urban Darwin                      | 145037    | 78      | 7143346      | SAMN1617350               | This study                                                 |
| MSHR1764  | <i>Burkholderia pseudomallei</i> | Human            | 2003 | Darwin remote region              | 149967    | 109     | 7148790      | SAMN1617351               | This study                                                 |
| MSHR1776  | <i>Burkholderia pseudomallei</i> | Human            | 2003 | Urban Darwin                      | 127356    | 92      | 7140340      | SAMN1617352               | This study                                                 |
| MSHR1825  | <i>Burkholderia pseudomallei</i> | Human            | 2004 | Urban Darwin                      | 99910     | 112     | 7139165      | SAMN1617353               | This study                                                 |
| MSHR1952  | <i>Burkholderia pseudomallei</i> | Human            | 2005 | Urban Darwin                      | 335802    | 36      | 7133899      | SRP065595                 | Price EP et al. Appl Environ Microbiol. 2016;82(3):954-63. |
| MSHR1960  | <i>Burkholderia pseudomallei</i> | Human            | 2005 | Urban Darwin                      | 75824     | 153     | 7152595      | SAMN1617354               | This study                                                 |
| MSHR2016  | <i>Burkholderia pseudomallei</i> | Human            | 2005 | Urban Darwin                      | 23863     | 47      | 7130400      | SRP065595                 | Price EP et al. Appl Environ Microbiol. 2016;82(3):954-63. |
| MSHR2047  | <i>Burkholderia pseudomallei</i> | Iguala           | 2004 | Urban Darwin                      | 93880     | 119     | 7152232      | SAMN1617355               | This study                                                 |
| MSHR2157  | <i>Burkholderia pseudomallei</i> | Human            | 2005 | Urban Darwin                      | 118442    | 109     | 7239824      | SAMN1617356               | This study                                                 |
| MSHR2174  | <i>Burkholderia pseudomallei</i> | Human            | 2005 | Darwin rural region               | 105466    | 109     | 7180634      | SAMN1617357               | This study                                                 |
| MSHR2349  | <i>Burkholderia pseudomallei</i> | Human            | 2006 | Urban Darwin                      | 85414     | 145     | 7140923      | SAMN1617358               | This study                                                 |
| MSHR2432  | <i>Burkholderia pseudomallei</i> | Human            | 2006 | Urban Darwin                      | 75767     | 107     | 7120667      | SAMN1617359               | This study                                                 |
| MSHR2436  | <i>Burkholderia pseudomallei</i> | Human            | 2006 | Urban Darwin                      | 103322    | 115     | 7134069      | SRP065595                 | Price EP et al. Appl Environ Microbiol. 2016;82(3):954-63. |
| MSHR2511  | <i>Burkholderia pseudomallei</i> | Human            | 2007 | Urban Darwin                      | 87532     | 150     | 7124121      | SRP065595                 | Price EP et al. Appl Environ Microbiol. 2016;82(3):954-63. |
| MSHR2535  | <i>Burkholderia pseudomallei</i> | Human            | 2007 | Darwin rural region               | 62385     | 230     | 7117018      | SAMN1617360               | This study                                                 |
| MSHR2559  | <i>Burkholderia pseudomallei</i> | Human            | 2007 | Urban Darwin                      | 140823    | 78      | 7143338      | SAMN1617361               | This study                                                 |
| MSHR2583  | <i>Burkholderia pseudomallei</i> | Human            | 2007 | Urban Darwin                      | 251573    | 46      | 7122082      | SRP065595                 | Price EP et al. Appl Environ Microbiol. 2016;82(3):954-63. |
| MSHR2632  | <i>Burkholderia pseudomallei</i> | Human            | 2007 | Darwin remote region              | 317685    | 45      | 7124720      | SRP065595                 | Price EP et al. Appl Environ Microbiol. 2016;82(3):954-63. |
| MSHR2661  | <i>Burkholderia pseudomallei</i> | Human            | 2007 | Urban Darwin                      | 254830    | 48      | 7128480      | SRP065595                 | Price EP et al. Appl Environ Microbiol. 2016;82(3):954-63. |
| MSHR2967  | <i>Burkholderia pseudomallei</i> | Human            | 2007 | Urban Darwin                      | 125042    | 100     | 7148596      | SAMN1617362               | This study                                                 |
| MSHR2994  | <i>Burkholderia pseudomallei</i> | Human            | 2008 | Darwin remote region              | 143220    | 83      | 7143200      | SAMN1617363               | This study                                                 |
| MSHR3008  | <i>Burkholderia pseudomallei</i> | Human            | 2008 | Urban Darwin                      | 154057    | 74      | 7136213      | SAMN1617364               | This study                                                 |
| MSHR3017  | <i>Burkholderia pseudomallei</i> | Human            | 2008 | Urban Darwin                      | 93660     | 131     | 7152818      | SAMN1617365               | This study                                                 |
| MSHR3532  | <i>Burkholderia pseudomallei</i> | Human            | 2009 | Urban Darwin                      | 136496    | 94      | 7140258      | SAMN1617366               | This study                                                 |
| MSHR4001  | <i>Burkholderia pseudomallei</i> | Human            | 2009 | Darwin rural region               | 62461     | 205     | 7120185      | SAMN1617367               | This study                                                 |
| MSHR4603  | <i>Burkholderia pseudomallei</i> | Human            | 2010 | Urban Darwin                      | 84010     | 42      | 7149742      | SRP065595                 | Price EP et al. Appl Environ Microbiol. 2016;82(3):954-63. |
| MSHR4638  | <i>Burkholderia pseudomallei</i> | Human            | 2010 | Urban Darwin                      | 247540    | 53      | 7127793      | SRP065595                 | Price EP et al. Appl Environ Microbiol. 2016;82(3):954-63. |
| MSHR4639  | <i>Burkholderia pseudomallei</i> | Human            | 2010 | Urban Darwin                      | 110410    | 113     | 7125330      | SRP065595                 | Price EP et al. Appl Environ Microbiol. 2016;82(3):954-63. |
| MSHR4722  | <i>Burkholderia pseudomallei</i> | Human            | 2010 | Urban Darwin                      | 47275     | 207     | 7114825      | SAMN1617368               | This study                                                 |
| MSHR4909  | <i>Burkholderia pseudomallei</i> | Human            | 2010 | Urban Darwin                      | 82321     | 148     | 7122073      | SRP065595                 | Price EP et al. Appl Environ Microbiol. 2016;82(3):954-63. |
| MSHR4953  | <i>Burkholderia pseudomallei</i> | Human            | 2009 | Urban Darwin                      | 62581     | 211     | 7116152      | SAMN1617369               | This study                                                 |
| MSHR4980  | <i>Burkholderia pseudomallei</i> | Human            | 2009 | Darwin rural region               | 66944     | 201     | 7112469      | SAMN1617370               | This study                                                 |
| MSHR3915  | <i>Burkholderia pseudomallei</i> | Human            | 2010 | Darwin rural region               | 71470     | 199     | 7144559      | SRP065595                 | Price EP et al. Appl Environ Microbiol. 2016;82(3):954-63. |
| MSHR4196  | <i>Burkholderia pseudomallei</i> | Human            | 2010 | Darwin rural region               | 36543     | 207     | 7104174      | SRP065595                 | Price EP et al. Appl Environ Microbiol. 2016;82(3):954-63. |
| MSHR4272  | <i>Burkholderia pseudomallei</i> | Human            | 2010 | Darwin rural region               | 78280     | 157     | 7137863      | SRP065595                 | Price EP et al. Appl Environ Microbiol. 2016;82(3):954-63. |
| MSHR4241  | <i>Burkholderia pseudomallei</i> | Human            | 2010 | Urban Darwin                      | 317788    | 38      | 7124821      | SRP065595                 | Price EP et al. Appl Environ Microbiol. 2016;82(3):954-63. |
| MSHR4396  | <i>Burkholderia pseudomallei</i> | Human            | 2010 | Urban Darwin                      | 61621     | 188     | 7110285      | SRP065595                 | Price EP et al. Appl Environ Microbiol. 2016;82(3):954-63. |
| MSHR4399  | <i>Burkholderia pseudomallei</i> | Human            | 2011 | Darwin rural region               | 72444     | 144     | 7107445      | SRP065595                 | Price EP et al. Appl Environ Microbiol. 2016;82(3):954-63. |
| MSHR4411  | <i>Burkholderia pseudomallei</i> | Human            | 2010 | Darwin rural region               | 25717     | 238     | 7128907      | SAMN1617371               | This study                                                 |
| MSHR4420  | <i>Burkholderia pseudomallei</i> | Human            | 2010 | Urban Darwin                      | 60854     | 202     | 7144324      | SAMN1617372               | This study                                                 |
| MSHR4434  | <i>Burkholderia pseudomallei</i> | Human            | 2010 | Urban Darwin                      | 65704     | 219     | 7134965      | SAMN1617373               | This study                                                 |
| MSHR4439  | <i>Burkholderia pseudomallei</i> | Human            | 2010 | Urban Darwin                      | 56743     | 233     | 7131179      | SAMN1617374               | This study                                                 |
| MSHR4441  | <i>Burkholderia pseudomallei</i> | Human            | 2010 | Urban Darwin                      | 67415     | 191     | 7140055      | SAMN1617375               | This study                                                 |
| MSHR4462  | <i>Burkholderia pseudomallei</i> | Soil             | 2010 | Adelaide River region             | 403718    | 4       | 7223079      | JQF0000000                | Johnson et al. Genome Announc. 2015 3(1):e01282-14         |
| MSHR4483  | <i>Burkholderia pseudomallei</i> | Soil             | 2010 | Adelaide River region             | 194048    | 62      | 7231247      | SRP065595                 | Price EP et al. Appl Environ Microbiol. 2016;82(3):954-63. |
| MSHR4593  | <i>Burkholderia pseudomallei</i> | Human            | 2011 | Darwin rural region               | 58102     | 253     | 7111516      | SAMN1617376               | This study                                                 |
| MSHR4708  | <i>Burkholderia pseudomallei</i> | Human            | 2011 | Darwin rural region               | 303779    | 47      | 7242620      | SRP065595                 | Price EP et al. Appl Environ Microbiol. 2016;82(3):954-63. |
| MSHR4640  | <i>Burkholderia pseudomallei</i> | Human            | 2012 | Urban Darwin                      | 67996     | 202     | 7125376      | SAMN1617377               | This study                                                 |
| MSHR4649  | <i>Burkholderia pseudomallei</i> | Human            | 2012 | Adelaide River region             | 20287     | 224     | 7126041      | SAMN1617378               | This study                                                 |
| MSHR6059  | <i>Burkholderia pseudomallei</i> | Human            | 2012 | Urban Darwin                      | 75968     | 155     | 7124588      | SAMN1617379               | This study                                                 |
| MSHR6357  | <i>Burkholderia pseudomallei</i> | Human            | 2012 | Urban Darwin                      | 40044     | 358     | 7175928      | SRP065595                 | Price EP et al. Appl Environ Microbiol. 2016;82(3):954-63. |
| MSHR6435  | <i>Burkholderia pseudomallei</i> | Human            | 2012 | Urban Darwin                      | 63122     | 179     | 7201410      | SRP065595                 | Price EP et al. Appl Environ Microbiol. 2016;82(3):954-63. |
| MSHR6473  | <i>Burkholderia pseudomallei</i> | Human            | 2012 | Darwin rural region               | 531386    | 38      | 7133517      | SRP065595                 | Price EP et al. Appl Environ Microbiol. 2016;82(3):954-63. |
| MSHR6455  | <i>Burkholderia pseudomallei</i> | Human            | 2012 | Urban Darwin                      | 84820     | 290     | 7122273      | SAMN1617381               | This study                                                 |
| MSHR6452  | <i>Burkholderia pseudomallei</i> | Human            | 2012 | Urban Darwin                      | 61720     | 207     | 7109518      | SRP065595                 | Price EP et al. Appl Environ Microbiol. 2016;82(3):954-63. |
| MSHR7465  | <i>Burkholderia pseudomallei</i> | Human            | 2012 | Urban Darwin                      | 43900     | 252     | 7050086      | SAMN1617382               | This study                                                 |
| MSHR7626  | <i>Burkholderia pseudomallei</i> | Capuchin         | 2012 | Urban Darwin                      | 139017    | 93      | 7149757      | SAMN1617383               | This study                                                 |
| MSHR7720  | <i>Burkholderia pseudomallei</i> | Human            | 2012 | Urban Darwin                      | 298939    | 62      | 7131289      | SAMN1617384               | This study                                                 |
| MSHR7723  | <i>Burkholderia pseudomallei</i> | Human            | 2012 | Darwin rural region               | 72502     | 175     | 7103352      | SRP065595                 | Price EP et al. Appl Environ Microbiol. 2016;82(3):954-63. |
| MSHR7775  |                                  |                  |      |                                   |           |         |              |                           |                                                            |
